# Supplementary material for: MARPLE, a point-of-care, strain-level disease diagnostics and surveillance tool for complex fungal pathogens
Source: BMC Biol. 2019 Aug 13;17:65. doi: 10.1186/s12915-019-0684-y (PMC6691556; doi:10.1186/s12915-019-0684-y)
Supplement: Supplementary file 3 — Phylogenetic analysis of the 301 global Pst isolates with bootstrap values. Newick format. (NEWICK 16 kb) [file 12915_2019_684_MOESM3_ESM.newick]

(16.0527:0.00000092171647261607,(16.0551:0.00000092171647261607,(((15.0597:0.00000092171647261607,(15.0308:0.00000092171647261607,(((15.0604:0.00000092171647261607,((15.0606:0.00000092171647261607,(15.0365:0.00000092171647261607,(15.0596:0.00000092171647261607,(15.0366:0.00000092171647261607,(((15.0353:0.00000092171647261607,(16.0142:0.00000092171647261607,(((15.0608:0.00000092171647261607,((15.0356:0.00000092171647261607,(16.0548:0.00000092171647261607,(15.0357:0.00000092171647261607,(15.0363:0.00000092171647261607,((15.0367:0.00000092171647261607,(15.0359:0.00000092171647261607,15.0348:0.00000092171647261607)29:0.00000092171647261607)7:0.00000092171647261607,15.0361:0.00000092171647261607)1:0.00000092171647261607)5:0.00000092171647261607)5:0.00000427515197261277)3:0.00000092171647261607)0:0.00000092171647261607,16.0529:0.00000092171647261607)0:0.00000092171647261607)0:0.00000092171647261607,16.0145:0.00000191596908817352)0:0.00000092171647261607,15.036:0.00000092171647261607)0:0.00000092171647261607)0:0.00000092171647261607)0:0.00000092171647261607,15.035:0.00000092171647261607)0:0.00000092171647261607,15.0609:0.00000092171647261607)2:0.00000145717562918458)1:0.00000092171647261607)4:0.00000092171647261607)3:0.00000092171647261607)2:0.00000092171647261607,16.0535:0.00000092171647261607)1:0.00000092171647261607)2:0.00000092171647261607,16.0536:0.00000092171647261607)2:0.00000092171647261607,15.0354:0.00000092171647261607)6:0.00000092171647261607)12:0.00000092171647261607)29:0.00002327289689593616,15.0305:0.00000092171647261607)14:0.00001866912642671958,((16.0555:0.00000092171647261607,(17.0006:0.00000092171647261607,(((((((((17.0204:0.00000371251000160200,17.0191:0.00000092171647261607)100:0.00017205714584967211,16.0144:0.00015261035147658256)25:0.00008513172710280400,(((17.0197:0.00000092171647261607,17.0207:0.00000092171647261607)65:0.00000092171647261607,(16.0782:0.00000092171647261607,16.0786:0.00000092171647261607)64:0.00000104951968134412)100:0.00019084224983434696,(15.0349:0.00012937383919294393,(16.0796:0.00018304159344504698,((17.0203:0.00000092171647261607,(17.0208:0.00000092171647261607,17.0189:0.00000092171647261607)96:0.00000350238115828595)100:0.00020140588966357048,((15.0078:0.00003427421998469555,((14.0076:0.00000092171647261607,((((14.0069:0.00000092171647261607,((14.0093:0.00000092171647261607,((14.0011:0.00000092171647261607,((14.0173:0.00000092171647261607,((13/19:0.00000092171647261607,(13/123:0.00000092171647261607,((13/26:0.00000092171647261607,(13/18:0.00000092171647261607,(((14.0015:0.00000092171647261607,((RB1:0.00000092171647261607,RB2:0.00000092171647261607)20:0.00000092171647261607,14.0190:0.00000092171647261607)3:0.00000092171647261607)0:0.00000092171647261607,13/65:0.00000092171647261607)1:0.00000092171647261607,14.0072:0.00000092171647261607)0:0.00000092171647261607)0:0.00000092171647261607)0:0.00000092171647261607,13/15:0.00000092171647261607)0:0.00000092171647261607)0:0.00000092171647261607)0:0.00000092171647261607,13/520:0.00000092171647261607)0:0.00000092171647261607)1:0.00000092295033008660,14.0169:0.00000092171647261607)0:0.00000092269183754308)0:0.00000096349870666143,(14.0001:0.00000092171647261607,(14.0103:0.00000092171647261607,((14.0060:0.00000092171647261607,((14.0008:0.00000092171647261607,(14.0099:0.00000092171647261607,14.0059:0.00000092171647261607)6:0.00000092171647261607)4:0.00000092171647261607,14.0061:0.00000092171647261607)0:0.00000092171647261607)1:0.00000420845912975863,14.0009:0.00000092171647261607)0:0.00000092171647261607)0:0.00000102381951905520)0:0.00000193401259801949)0:0.00000092171647261607)0:0.00000098660391422195,14.0101:0.00000092171647261607)0:0.00000457566081685534)0:0.00000095644056985021,14.0002:0.00000092171647261607)1:0.00000560613470678294,((14.0098:0.00000092171647261607,((11/08Warrior:0.00000092171647261607,FW1:0.00000092171647261607)99:0.00000092171647261607,14.0092:0.00000092171647261607)5:0.00000092171647261607)6:0.00000635256917774374,14.0188:0.00000092171647261607)5:0.00001826117755273938)55:0.00000826882307601235,14.0026:0.00000092171647261607)100:0.00015679788543574379)69:0.00000092171647261607,(13/27:0.00000092171647261607,13/120:0.00000092171647261607)99:0.00001057041887587040)100:0.00026343952548293665)94:0.00022945596214724585,(((15.0409:0.00000092171647261607,(14.0025:0.00000092171647261607,(16.0182:0.00000092171647261607,((14.0027:0.00000092171647261607,16.0186:0.00000092171647261607)84:0.00000092171647261607,16.0183:0.00000092171647261607)51:0.00000092171647261607)67:0.00000092171647261607)99:0.00000820777905926483)99:0.00006358703750498798,(17.0089:0.00000092171647261607,(17.0090:0.00000092171647261607,17.0286:0.00000092171647261607)34:0.00000092171647261607)38:0.00000092171647261607)48:0.00000092171647261607,(17.0031:0.00000092171647261607,((17.0030:0.00000092171647261607,17.0029:0.00000092171647261607)54:0.00000092171647261607,17.0028:0.00000092171647261607)49:0.00000092171647261607)61:0.00000145809738223913)100:0.00023290261053187994)35:0.00009917114419802471)38:0.00006235290671327152)23:0.00005210889472132633)25:0.00009877380744344834)10:0.00005300538617298236)8:0.00007616707151812080,(((16.0802:0.00002112825117543068,(16.0803:0.00000092171647261607,16.0797:0.00000092171647261607)100:0.00008329044009053847)98:0.00013387008763440390,((((16.0789:0.00000092171647261607,16.0801:0.00000092171647261607)100:0.00013510342771768673,(16.0788:0.00009381697030815789,16.0794:0.00004588610349366783)94:0.00013881547711699089)90:0.00017738772062300874,(16.0783:0.00000092171647261607,16.0787:0.00000092171647261607)100:0.00018509084636473329)54:0.00009345073137898226,(16.0799:0.00012547038133716847,(16.0800:0.00018545058377308617,((16.0804:0.00000092171647261607,16.0798:0.00000208741033200878)100:0.00012936357743687584,(16.0793:0.00000092171647261607,(16.0791:0.00000092171647261607,16.0790:0.00000092171647261607)99:0.00000157249429302544)100:0.00016364294510931202)89:0.00012030116390154820)60:0.00008875727483196154)57:0.00008897148471814199)49:0.00008064390098436113)100:0.00022509795202655343,(((17.0194:0.00000092171647261607,17.0193:0.00000092171647261607)100:0.00018109234038690011,17.0192:0.00014935644223703517)31:0.00005298275641685575,17.0190:0.00014849825739746944)36:0.00008790572454666140)33:0.00009065574490342359)42:0.00009618649620003351,(15.0573:0.00000092171647261607,(15.0579:0.00000092171647261607,15.0574:0.00000092171647261607)63:0.00000092171647261607)100:0.00040857468299990168)100:0.00036382932209058486,(((((13/32:0.00000092171647261607,(((13/12:0.00000092171647261607,((14.0039:0.00000092171647261607,((14.0158:0.00000092171647261607,(13/34:0.00000092171647261607,(14.0084:0.00000092171647261607,(14.0004:0.00000092171647261607,((13/22:0.00000092171647261607,(((14.0014:0.00000092171647261607,(((14.0024:0.00000092171647261607,(14.0181:0.00000092171647261607,(14.0042:0.00000092171647261607,(((13/36:0.00000092171647261607,(14.0044:0.00000092171647261607,(((((((14.0227:0.00000092171647261607,14.0195:0.00000092171647261607)86:0.00002093638499482004,(14.0182:0.00000092171647261607,((14.0210:0.00000092171647261607,(14.0216:0.00000092171647261607,((14.0205:0.00000092171647261607,((14.0225:0.00000092171647261607,(14.0226:0.00000092171647261607,14.0218:0.00000092171647261607)59:0.00000092171647261607)23:0.00000092171647261607,14.0193:0.00000092171647261607)23:0.00000092171647261607)16:0.00000092171647261607,14.0183:0.00000092171647261607)21:0.00000092171647261607)21:0.00000772166346072873)13:0.00000092171647261607,14.0191:0.00000092171647261607)22:0.00001299710515622622)18:0.00000092171647261607)34:0.00005316243820274272,(14.0203:0.00000218119016173329,14.0160:0.00000092171647261607)14:0.00000092171647261607)5:0.00002729976130093104,((((14.0167:0.00000092171647261607,(14.0165:0.00000092171647261607,(14.0135:0.00000092171647261607,(14.0175:0.00000092171647261607,(((((14.0126:0.00000092171647261607,(14.0047:0.00000092171647261607,(14.0180:0.00000092171647261607,((14.0146:0.00000092171647261607,(14.0105:0.00000092171647261607,(((14.0172:0.00000092171647261607,(13/37:0.00000092171647261607,((14.0095:0.00000092171647261607,((14.0151:0.00000092171647261607,(14.0091:0.00000092171647261607,14.0179:0.00000092171647261607)4:0.00000092171647261607)0:0.00000092171647261607,(14.0096:0.00000092171647261607,(14.0086:0.00000092171647261607,(13/29:0.00000092171647261607,(14.0088:0.00000092171647261607,(14.0128:0.00000092171647261607,(14.0087:0.00000092171647261607,(14.0094:0.00000092171647261607,(14.0140:0.00000092171647261607,(((14.0018:0.00000092171647261607,(14.0153:0.00000092171647261607,((((14.0139:0.00000092171647261607,((14.0090:0.00000092171647261607,(14.0127:0.00000092171647261607,(14.0016:0.00000092171647261607,(14.0215:0.00000092171647261607,(14.0145:0.00000092171647261607,(14.0148:0.00000092171647261607,((14.0163:0.00000092171647261607,(14.0020:0.00000092171647261607,14.0174:0.00000092171647261607)12:0.00000092171647261607)8:0.00000092171647261607,14.0176:0.00000092171647261607)3:0.00000092171647261607)2:0.00000092171647261607)2:0.00000092171647261607)0:0.00000092171647261607)0:0.00000092171647261607)0:0.00000092171647261607)0:0.00000092171647261607,14.0129:0.00000092171647261607)0:0.00000092171647261607)0:0.00000092171647261607,14.0142:0.00000092171647261607)0:0.00000092171647261607,14.0152:0.00000092171647261607)0:0.00000092171647261607,14.0166:0.00000092171647261607)0:0.00000092171647261607)0:0.00000092171647261607)0:0.00000092171647261607,14.0023:0.00000092171647261607)0:0.00000092171647261607,14.0097:0.00000092171647261607)0:0.00000092171647261607)0:0.00000092171647261607)0:0.00000092171647261607)0:0.00000092171647261607)0:0.00000092171647261607)0:0.00000092171647261607)0:0.00000092171647261607)0:0.00000092171647261607)0:0.00000092171647261607)0:0.00000092171647261607)0:0.00000092171647261607,13/14:0.00000092171647261607)0:0.00000092171647261607)0:0.00000092171647261607)0:0.00000092171647261607,14.0017:0.00000092171647261607)0:0.00000092171647261607,14.0089:0.00000092171647261607)0:0.00000092171647261607)0:0.00000092171647261607)0:0.00000092171647261607,14.0159:0.00000092171647261607)0:0.00000092171647261607)0:0.00000092171647261607)0:0.00000092171647261607)0:0.00000092171647261607,14.0043:0.00000092171647261607)0:0.00000092171647261607,14.0007:0.00000092171647261607)0:0.00000092171647261607,14.0021:0.00000092171647261607)0:0.00000092171647261607,14.0037:0.00000092171647261607)0:0.00000092171647261607)0:0.00000092171647261607)0:0.00000092171647261607)0:0.00000092171647261607)0:0.00000092171647261607,14.0155:0.00000092171647261607)0:0.00000092171647261607,14.0046:0.00000092171647261607)0:0.00000092171647261607,14.0041:0.00000092171647261607)0:0.00000092171647261607)0:0.00000092171647261607,14.0035:0.00000092171647261607)0:0.00000092171647261607,14.0036:0.00000092171647261607)0:0.00000092171647261607,14.0079:0.00000092171647261607)0:0.00000092171647261607)0:0.00000092603235388840)0:0.00000093282327582824,14.0108:0.00000092171647261607)0:0.00000147732075876238,14.0081:0.00000092171647261607)0:0.00000092171647261607)0:0.00000092171647261607)0:0.00001395739457654907)0:0.00000092171647261607,14.0006:0.00000092171647261607)0:0.00000092171647261607,13/24:0.00000092171647261607)0:0.00000092171647261607)0:0.00000092171647261607,14.0005:0.00000092171647261607)0:0.00000092171647261607,13/25:0.00000092171647261607)0:0.00000092171647261607)0:0.00000092171647261607,14.0085:0.00000092171647261607)0:0.00000313970240852153)1:0.00000092370162953068)0:0.00000092171647261607)1:0.00000092171647261607)1:0.00001991551048184892,13/28:0.00000092171647261607)2:0.00000092171647261607)3:0.00000092171647261607,14.0019:0.00000092171647261607)3:0.00000092171647261607)1:0.00000092171647261607,13/30:0.00000092171647261607)1:0.00000092171647261607,(13/40:0.00000092171647261607,((13/20:0.00000092171647261607,(13/39:0.00000092171647261607,13/71:0.00000092171647261607)25:0.00000092171647261607)10:0.00000092171647261607,13/35:0.00000092171647261607)11:0.00000092171647261607)3:0.00000092171647261607)1:0.00000092171647261607)8:0.00000092171647261607,14.0040:0.00000092171647261607)100:0.00038015789936790654,(13/38:0.00000092171647261607,(14.0141:0.00000789567525244138,(14.0078:0.00000092171647261607,((78/66:0.00000092171647261607,(J02055C:0.00000446425356514754,((87/66s1:0.00000092171647261607,(WYR78.66SS1:0.00000092171647261607,((J0085F:0.00000092171647261607,J89121M6:0.00000092171647261607)52:0.00001124764786792011,(J01144Bm1:0.00000092171647261607,(J89110:0.00000092171647261607,j02-022:0.00000092171647261607)2:0.00000094952518431596)2:0.00000475129974424277)0:0.00001612561710330598)0:0.00000092171647261607)0:0.00000092171647261607,((98/83s3:0.00000092171647261607,(WYR88.45SS:0.00000092171647261607,(WYR88.44SS3:0.00000092171647261607,((08/501Timber:0.00000092171647261607,(11/140Sterling:0.00000092171647261607,((01/34s10:0.00000092171647261607,WYR88.55SS:0.00000092171647261607)0:0.00000092171647261607,08/21Solstice:0.00000092171647261607)0:0.00000092171647261607)0:0.00000092171647261607)0:0.00000092171647261607,87/27s2:0.00000092171647261607)0:0.00000092171647261607)0:0.00000092171647261607)0:0.00000092171647261607)0:0.00000179549581795936,(WYR88.5SS1:0.00000092171647261607,(03/7Brock:0.00000092171647261607,J8861m2:0.00000092171647261607)34:0.00000192669680866341)3:0.00000749025761723208)0:0.00002552723965619449)60:0.00006599300503577963)100:0.00053321761379814881)51:0.00002290145295108763,(13/23:0.00000187949782708434,(13/33:0.00000092171647261607,(13/182:0.00000237216453272638,(13/42:0.00000209074544457258,(13/09:0.00000092171647261607,13/21:0.00000092171647261607)35:0.00000092171647261607)31:0.00000092171647261607)12:0.00000092171647261607)63:0.00000092171647261607)88:0.00001213750756343170)98:0.00007540575574434297)92:0.00021015496254282091)100:0.00054948472325374274)15:0.00000092171647261607)65:0.00023590320778393316,((15.019:0.00000092171647261607,((15.0191:0.00000092171647261607,14.0077:0.00000092171647261607)9:0.00000092171647261607,((16.0771:0.00000092171647261607,16.0772:0.00000289266993942366)89:0.00001666778298377022,(15.0188:0.00000092171647261607,(15.0189:0.00000092171647261607,(T13/3:0.00000092171647261607,((14.0115:0.00001079646291722311,((Clarecollected(CL1):0.00000092171647261607,(14.0010:0.00000092171647261607,(T13/2:0.00000092171647261607,14.0120:0.00000092171647261607)37:0.00000092171647261607)23:0.00000092171647261607)19:0.00000092171647261607,T13/1:0.00000092171647261607)36:0.00000092171647261607)47:0.00000092171647261607,14.0062:0.00000092171647261607)44:0.00000092171647261607)49:0.00000092171647261607)69:0.00001796774355948612)75:0.00001075257162795644)66:0.00001155867549698156)95:0.00002817127796946163)98:0.00007541716924275357,(14.0236:0.00024942416834419507,((12/12:0.00011300860108364964,11/03:0.00010645079359606167)100:0.00034705640948743619,((14.0238:0.00014994017336524099,(14.0240:0.00018311692623985756,14.0239:0.00019080856303863814)100:0.00028467907895278043)100:0.00045058557268981363,((14.0080:0.00019844638240806866,((((06/01:0.00008097796306586204,12/08:0.00014417273746924873)100:0.00014132089771858654,11/128:0.00010533824914182741)100:0.00132149590019628449,11/13:0.00044062300243716328)59:0.00027363204374509164,((14.0030:0.00069323585587659881,14.0029:0.00087274681848645687)100:0.00128818512454876503,((ATR-2:0.00102363356741461977,ATR-3:0.00071138537600603591)97:0.00038245868878140405,((Qld-2:0.00013537884466994913,(Qld-3:0.00117529932584001847,Qld-1:0.00015135408632487165)53:0.00008507666743206073)100:0.00080477989752335223,ATR-1:0.00101861989878135372)75:0.00028204952659934647)100:0.00086327682047243615)100:0.00088786484084047020)100:0.00197645180139513358)100:0.00071336370975067268,(Chile_31:0.00027319282503633678,((Chile_30:0.00021381908089139191,(Chile_3:0.00022380847320928234,Chile_4:0.00014963998714821047)37:0.00007747982540963376)22:0.00007571361664635061,Chile_18:0.00020381866843493455)51:0.00007686835820879526)98:0.00049372243909020380)100:0.00105095447537117363)46:0.00033042896580228327)100:0.00051676372145182867)100:0.00086125371810334380)95:0.00016629385391214534)96:0.00023080337126246900,(16.0776:0.00000092171647261607,(16.0779:0.00000092171647261607,(16.0775:0.00000092171647261607,16.0774:0.00000092171647261607)99:0.00000092171647261607)98:0.00000711176778553785)100:0.00026212206400497682)52:0.00013657519731810012)99:0.00020684610586226696,(15.0355:0.00000290532153884672,15.0351:0.00003136690364077177)22:0.00001789757723786967)18:0.00005889950882306549,(17.0008:0.00000092171647261607,(17.0009:0.00000092171647261607,((17.0021:0.00000092171647261607,(15.0306:0.00000092171647261607,17.0058:0.00000092171647261607)7:0.00000092171647261607)6:0.00000092171647261607,16.0554:0.00000092171647261607)5:0.00000092171647261607)1:0.00000294441750157374)2:0.00000184993180381238)5:0.00000092171647261607,17.0057:0.00000092171647261607)6:0.00000092171647261607)6:0.00001544962361845206)13:0.00002050500330095826,(17.0007:0.00000092171647261607,17.0022:0.00000092171647261607)17:0.00000115614428526369)10:0.00000854496249513892)7:0.00000092171647261607)22:0.00000184945274380001,17.0023:0.00000092171647261607);
