# Supplementary material for: MARPLE, a point-of-care, strain-level disease diagnostics and surveillance tool for complex fungal pathogens
Source: BMC Biol. 2019 Aug 13;17:65. doi: 10.1186/s12915-019-0684-y (PMC6691556; doi:10.1186/s12915-019-0684-y)
Supplement: Supplementary file 10 — Phylogenetic analysis for the 301 global Pst isolates, 55 Ethiopian Pst-infected field samples and Pst isolates representative of several major genetic groups, with bootstrap values. Data for the Ethiopian Pst isolates and representative genetic group isolates were generated on the MinION platform. Newick format. (NEWICK 21 kb) [file 12915_2019_684_MOESM10_ESM.newick]

((15.0305:0.00000080684830150537,(15.0359:0.00000080684830150537,15.0351:0.00000080684830150537):0.00000080684830150537[23]):0.00000080684830150537[11],((15.0604:0.00000080684830150537,(15.0348:0.00000080684830150537,((17.0009:0.00000080684830150537,(15.0356:0.00000080684830150537,(((US312/14:0.00008652315866630047,(((((((15.0609:0.00000080684830150537,((16.0535:0.00000080684830150537,(15.036:0.00000080684830150537,(15.0353:0.00000080684830150537,((16.0142:0.00000080684830150537,((15.0608:0.00000080684830150537,(17.0021:0.00000080684830150537,(17.0058:0.00000080684830150537,(15.0354:0.00000080684830150537,((15.0306:0.00000080684830150537,((15.0357:0.00000080684830150537,(16.0529:0.00000080684830150537,17.0023:0.00000080684830150537):0.00000080684830150537[1]):0.00000080684830150537[1],15.0606:0.00000080684830150537):0.00000080684830150537[1]):0.00000080684830150537[3],17.0007:0.00000080684830150537):0.00000080684830150537[1]):0.00000080684830150537[0]):0.00000080684830150537[0]):0.00000080684830150537[0]):0.00000080684830150537[0],16.0548:0.00000080684830150537):0.00000080684830150537[0]):0.00000080684830150537[0],15.0363:0.00000080684830150537):0.00000080684830150537[0]):0.00000080684830150537[0]):0.00000080684830150537[0]):0.00000080684830150537[0],15.0365:0.00000080684830150537):0.00000080684830150537[0]):0.00000080684830150537[0],15.0596:0.00000080684830150537):0.00000080684830150537[0],15.0361:0.00000080684830150537):0.00000080684830150537[0],17.0057:0.00000080684830150537):0.00000080684830150537[0],16.0551:0.00000080684830150537):0.00000080684830150537[0],17.0006:0.00000080684830150537):0.00000080684830150537[0],17.0008:0.00000080684830150537):0.00000080684830150537[0]):0.00001648386874513496[0],17.0022:0.00000080684830150537):0.00000080684830150537[0],15.0597:0.00000080684830150537):0.00000080684830150537[0]):0.00000080684830150537[0]):0.00000080684830150537[0],16.0555:0.00000844744613231225):0.00000488621222744323[0]):0.00000080684830150537[0]):0.00000082093538339556[0],(16.0527:0.00000080684830150537,((((16.0536:0.00000080684830150537,(16.0554:0.00000080684830150537,(15.0366:0.00000080684830150537,(15.0355:0.00000080684830150537,16.0145:0.00000080684830150537):0.00000080684830150537[29]):0.00000685776808081899[22]):0.00000732946825154063[9]):0.00000080684830150537[3],(((((SE225/15:0.00017109716202360983,(((17.0548:0.00000080684830150537,(17.0567:0.00000589023117411554,17.0571:0.00000080684830150537):0.00000080684830150537[24]):0.00000542319018933580[26],17.05585:0.00000080684830150537):0.00001285224183682911[36],(AZ165/16:0.00001221406401156927,(17.0549:0.00000080684830150537,(AZ160/16:0.00000080684830150537,KE86058:0.00000080684830150537):0.00000731005153620799[50]):0.00000080684830150537[0]):0.00000480382913472784[6]):0.00007476079276193427[100]):0.00023611250450467959[28],ET08/10:0.01123522782729401842):0.00067940325667467975[99],((UZ180/13:0.00000080684830150537,UZ14/10:0.00000080684830150537):0.00011407355717956004[100],(17.0564:0.00001622525532087413,(16.0883:0.00000080684830150537,((17.0595:0.00000080684830150537,(17.0612:0.00000080684830150537,(17.0570:0.00001116049237915923,(17.0611:0.00000080684830150537,((17.0501:0.00000080684830150537,(17.0510:0.00000080684830150537,(((17.0525:0.00000080684830150537,(17.0491:0.00000080684830150537,(17.0602:0.00000080684830150537,((17.0515:0.00000080684830150537,((((17.0504:0.00000080684830150537,(17.0562:0.00000832670529561171,(17.0500:0.00000655236451069453,(((Eth-DNA3:0.00000080684830150537,Eth-DNA4:0.00000080684830150537):0.00001706601244232351[96],(Eth-DNA1:0.00000080684830150537,Eth-DNA2:0.00000599803558705965):0.00000080684830150537[65]):0.00035324005905524604[100],17.0600:0.00000080684830150537):0.00000080684830150537[11]):0.00000080684830150537[3]):0.00000080684830150537[0]):0.00000080684830150537[0],17.0615:0.00000080684830150537):0.00000080684830150537[0],17.0490:0.00000080684830150537):0.00000080684830150537[0],17.0497:0.00000080684830150537):0.00000080684830150537[0]):0.00001566253629588850[0],17.0495:0.00000080684830150537):0.00000080684830150537[0]):0.00000080684830150537[0]):0.00000080684830150537[0]):0.00000080684830150537[0],((17.0494:0.00000080684830150537,(17.0569:0.00000080684830150537,(17.0499:0.00000080684830150537,((17.0511:0.00000080684830150537,(17.0519:0.00000080684830150537,(((17.0614:0.00000080684830150537,17.0528:0.00000080684830150537):0.00001128720137013595[34],17.0520:0.00000080684830150537):0.00001325764937358237[2],(17.0532:0.00000080684830150537,(17.0492:0.00000080684830150537,17.0559:0.00000080684830150537):0.00000080684830150537[29]):0.00001947376182815732[3]):0.00001381209875360504[0]):0.00000080684830150537[0]):0.00000080684830150537[0],17.0496:0.00000080684830150537):0.00000080684830150537[0]):0.00000080684830150537[0]):0.00001753291629364070[0]):0.00000443955028295611[0],17.0523:0.00000080684830150537):0.00000080684830150537[0]):0.00001962596611958891[0],17.0557:0.00000080684830150537):0.00000080684830150537[0]):0.00000655081452643514[0]):0.00000081741629843206[0],(17.0493:0.00000080684830150537,17.0507:0.00000080684830150537):0.00000706008849971434[11]):0.00001341928510396662[0]):0.00000080684830150537[0]):0.00000161718496261774[0]):0.00000087185434407083[0]):0.00000080684830150537[0],(17.0518:0.00000080684830150537,((17.0613:0.00000080684830150537,(17.0489:0.00000080684830150537,(17.0553:0.00000080684830150537,((17.0503:0.00000080684830150537,(17.0565:0.00000080684830150537,(17.0563:0.00000080684830150537,17.0498:0.00000080684830150537):0.00000080684830150537[22]):0.00000837478477919398[14]):0.00000080684830150537[1],17.0521:0.00000080684830150537):0.00000792306734077465[3]):0.00001527173020946456[0]):0.00000167124375904262[0]):0.00000080684830150537[0],17.0593:0.00000080684830150537):0.00000080684830150537[0]):0.00001528839576106962[0]):0.00001646188050110451[33]):0.00024733875690062507[100]):0.00028934687427577228[99]):0.00036085854340106420[100]):0.00065900132258457970[34],(16.0779:0.00000080684830150537,((16.0774:0.00000080684830150537,16.0775:0.00000080684830150537):0.00000080684830150537[83],16.0776:0.00000362844495135013):0.00000080684830150537[38]):0.00012190588695190817[93]):0.00023594185507996464[22],(((15.019:0.00000080684830150537,((14.0062:0.00000080684830150537,(((15.0191:0.00000080684830150537,(T13/1:0.00000080684830150537,((14.0077:0.00000080684830150537,((Clarecollected(CL1):0.00000080684830150537,(15.0188:0.00000080684830150537,14.0120:0.00000080684830150537):0.00000080684830150537[19]):0.00000080684830150537[25],14.0010:0.00000080684830150537):0.00000080684830150537[31]):0.00000080684830150537[33],15.0189:0.00000080684830150537):0.00000080684830150537[31]):0.00000080684830150537[23]):0.00000917896539304341[30],(14.0115:0.00000080684830150537,(16.0772:0.00000080684830150537,16.0771:0.00000080684830150537):0.00000424114568459908[61]):0.00000081308157197806[4]):0.00000080684830150537[0],T13/3:0.00000080684830150537):0.00000088607537240766[4]):0.00000506087664011779[5],T13/2:0.00000080684830150537):0.00000080684830150537[11]):0.00011556709389714554[30],((13/38:0.00000080684830150537,(14.0141:0.00001130062620464364,(14.0078:0.00000080684830150537,(((13/09:0.00000080684830150537,(13/182:0.00000080684830150537,(13/42:0.00000334548442706997,(13/21:0.00000080684830150537,(13/33:0.00000080684830150537,13/23:0.00000080684830150537):0.00000080684830150537[12]):0.00000080684830150537[3]):0.00000080684830150537[1]):0.00000080684830150537[23]):0.00000235895870657868[63],78/66:0.00000080684830150537):0.00000638615015379804[60],(J02055C:0.00000396646587624437,((J89121M6:0.00000080684830150537,(08/501Timber:0.00000080684830150537,(WYR78.66SS1:0.00000080684830150537,((08/21Solstice:0.00000080684830150537,(87/27s2:0.00000080684830150537,((WYR88.45SS:0.00000080684830150537,((WYR88.5SS1:0.00000080684830150537,((((J0085F:0.00000798712838541088,J8861m2:0.00000080684830150537):0.00000080684830150537[35],j02-022:0.00000080684830150537):0.00000080684830150537[18],J01144Bm1:0.00000080684830150537):0.00000080684830150537[7],WYR88.55SS:0.00000080684830150537):0.00000080684830150537[4]):0.00000080684830150537[1],WYR88.44SS3:0.00000080684830150537):0.00000080684830150537[0]):0.00000080684830150537[1],98/83s3:0.00000080684830150537):0.00000080684830150537[1]):0.00000080684830150537[0]):0.00000080684830150537[0],87/66s1:0.00000080684830150537):0.00000080684830150537[0]):0.00000494778738974186[0]):0.00000080684830150537[0]):0.00002866419431135563[1],((11/140Sterling:0.00000080684830150537,(J89110:0.00000080684830150537,03/7Brock:0.00000080684830150537):0.00000080684830150537[18]):0.00000245765063936567[9],01/34s10:0.00000080684830150537):0.00001543701035180622[3]):0.00005468165660262072[60]):0.00063590480797059393[100]):0.00007051632251328217[95]):0.00032074356456771535[95]):0.00031994938040953968[99]):0.00012173175989472507[55],((((11/03:0.00011826068727033454,12/12:0.00014624608212806525):0.00039220828632524607[100],(14.0238:0.00012715005307097443,(14.0240:0.00031955719536313446,14.0239:0.00021017996131918396):0.00018737460715920537[99]):0.00014898669218035363[69]):0.00028828936812470515[91],((Chile_3:0.00010477907541455768,(Chile_31:0.00025157558906443322,((Chile_4:0.00018862519500867730,Chile_30:0.00030229594315758974):0.00010129110558988084[21],Chile_18:0.00019998924369082099):0.00008533693886177744[16]):0.00019878857188008564[51]):0.00028911281184480948[48],(14.0080:0.00017198953896368119,(((14.0029:0.00105180352463658941,14.0030:0.00075178308136378692):0.00095079738711416871[100],(((Qld-2:0.00011990853805949392,Qld-3:0.00142898050597697109):0.00014421249007855904[96],Qld-1:0.00025278522371185926):0.00077778351627922162[100],((ATR-2:0.00100281573796334083,ATR-3:0.00071387323247035532):0.00045156670157519804[100],ATR-1:0.00094200612083052550):0.00022681302403696046[95]):0.00117765289010088293[100]):0.00062997432465030365[100],(11/13:0.00059858241613479845,(11/128:0.00011453660085634245,(06/01:0.00015372008451891415,12/08:0.00023292859110673686):0.00015781467078304870[95]):0.00154070603228335739[100]):0.00046641186829989256[100]):0.00284975599013737209[100]):0.00091814326381591633[100]):0.00056192212815431828[100]):0.00044915791755529248[100],14.0236:0.00003792909125762588):0.00043615782181167232[100]):0.00005240396555694571[21]):0.00019225179250876017[13],((17.0204:0.00000080684830150537,17.0191:0.00000080684830150537):0.00014745133619261034[100],((15.0573:0.00000080684830150537,(15.0574:0.00000080684830150537,15.0579:0.00000080684830150537):0.00000080684830150537[50]):0.00037209410686185590[100],((((15.0078:0.00008497245702393349,((DK52/16:0.00011946152577213267,UZ189/16:0.00070175018381990690):0.00027341778929286124[79],(((17.0286:0.00000080684830150537,(((17.0028:0.00000080684830150537,(17.0029:0.00000080684830150537,(17.0090:0.00000080684830150537,(16.0183:0.00000080684830150537,(14.0025:0.00000080684830150537,(16.0182:0.00000080684830150537,(14.0027:0.00000080684830150537,16.0186:0.00000080684830150537):0.00000080684830150537[74]):0.00000080684830150537[56]):0.00000080684830150537[24]):0.00000080684830150537[31]):0.00000080684830150537[20]):0.00000804374744807959[28]):0.00000968020404820220[17],15.0409:0.00000080684830150537):0.00000081179134856528[10],17.0031:0.00000080684830150537):0.00000080684830150537[11]):0.00000080684830150537[18],17.0089:0.00000080684830150537):0.00000080684830150537[24],17.0030:0.00000080684830150537):0.00008430768811110442[62]):0.00007668584752049771[48]):0.00008934417083824821[33],((14.0085:0.00000080684830150537,((13/40:0.00000080684830150537,(13/32:0.00000080684830150537,(13/30:0.00000080684830150537,(((13/36:0.00000080684830150537,(13/71:0.00000080684830150537,(14.0153:0.00000080684830150537,((14.0195:0.00000080684830150537,DK15/16:0.00052286694849305046):0.00002439218317584354[25],(14.0090:0.00000080684830150537,(14.0042:0.00000080684830150537,(13/29:0.00000080684830150537,(((14.0024:0.00000080684830150537,((13/12:0.00000080684830150537,((13/34:0.00000080684830150537,(14.0127:0.00000080684830150537,(13/25:0.00000080684830150537,((14.0047:0.00000080684830150537,(14.0041:0.00000080684830150537,(((14.0180:0.00000080684830150537,(14.0155:0.00000080684830150537,(14.0037:0.00000080684830150537,(14.0043:0.00000080684830150537,(13/20:0.00000080684830150537,(13/14:0.00000080684830150537,((((13/37:0.00000080684830150537,((13/24:0.00000080684830150537,(14.0079:0.00000080684830150537,(14.0087:0.00000080684830150537,((((14.0089:0.00000080684830150537,(14.0167:0.00000080684830150537,(14.0158:0.00000080684830150537,(14.0084:0.00000080684830150537,(((14.0172:0.00000080684830150537,(14.0081:0.00000080684830150537,((14.0108:0.00000080684830150537,(14.0086:0.00000080684830150537,((14.0160:0.00000080684830150537,(14.0023:0.00000080684830150537,((14.0097:0.00000080684830150537,(14.0105:0.00000080684830150537,(((14.0039:0.00000080684830150537,((((14.0046:0.00000080684830150537,(14.0166:0.00000080684830150537,(14.0126:0.00000080684830150537,(14.0095:0.00000080684830150537,(14.0159:0.00000080684830150537,((14.0006:0.00000080684830150537,(14.0135:0.00000080684830150537,((14.0175:0.00000080684830150537,(14.0151:0.00000080684830150537,((14.0091:0.00000080684830150537,(14.0148:0.00000080684830150537,14.0179:0.00000080684830150537):0.00000080684830150537[8]):0.00000080684830150537[6],14.0203:0.00000080684830150537):0.00000080684830150537[1]):0.00000080684830150537[0]):0.00000080684830150537[1],14.0139:0.00000080684830150537):0.00000080684830150537[0]):0.00000080684830150537[0]):0.00000080684830150537[0],14.0174:0.00000080684830150537):0.00000080684830150537[0]):0.00000080684830150537[0]):0.00000080684830150537[0]):0.00000080684830150537[0]):0.00000080684830150537[0]):0.00000391343816877043[0],14.0181:0.00000080684830150537):0.00000080684830150537[0],((14.0036:0.00000080684830150537,((14.0019:0.00000080684830150537,((14.0215:0.00000080684830150537,(14.0129:0.00000080684830150537,(14.0182:0.00000080684830150537,((((14.0193:0.00000080684830150537,(14.0210:0.00000080684830150537,(((14.0226:0.00000080684830150537,(14.0227:0.00000985976335409872,14.0216:0.00000080684830150537):0.00000080684830150537[5]):0.00000080684830150537[9],14.0225:0.00000080684830150537):0.00000080684830150537[6],14.0183:0.00000080684830150537):0.00000080684830150537[5]):0.00000080684830150537[2]):0.00000080684830150537[3],14.0218:0.00000080684830150537):0.00000080684830150537[2],14.0191:0.00000080684830150537):0.00000080684830150537[5],14.0205:0.00000080684830150537):0.00000080684830150537[4]):0.00003718487563068453[18]):0.00001118116144093091[10]):0.00002611944551007553[2],14.0140:0.00000080684830150537):0.00000080684830150537[0]):0.00000080684830150537[0],14.0016:0.00000080684830150537):0.00000080684830150537[0]):0.00001439939919096744[0],14.0176:0.00000080684830150537):0.00000080684830150537[0]):0.00000080684830150537[0],14.0004:0.00000080684830150537):0.00001135733118769664[0]):0.00000080684830150537[0],14.0088:0.00000080684830150537):0.00000080684830150537[0],14.0094:0.00000080684830150537):0.00000080684830150537[0]):0.00000080684830150537[0]):0.00000080684830150537[0],14.0020:0.00000080684830150537):0.00002660240696641231[0]):0.00000160958735213959[0]):0.00000080684830150537[0],14.0152:0.00000080684830150537):0.00000080684830150537[0]):0.00000080684830150537[0]):0.00000080684830150537[0],14.0165:0.00000080684830150537):0.00000080684830150537[0]):0.00000251612246643334[0]):0.00000080684830150537[0],14.0005:0.00000080684830150537):0.00001080443634472390[0],14.0007:0.00000080684830150537):0.00000080970512779338[0]):0.00000080684830150537[0]):0.00000080684830150537[0]):0.00000159559625170922[0]):0.00000156879825429501[0],14.0142:0.00000080684830150537):0.00000080684830150537[0],14.0040:0.00000080684830150537):0.00000080684830150537[0],14.0096:0.00000080684830150537):0.00000080684830150537[0]):0.00000080684830150537[0]):0.00000080684830150537[0]):0.00000080684830150537[0],13/22:0.00000080684830150537):0.00000080684830150537[0]):0.00000080684830150537[0],14.0021:0.00000080684830150537):0.00000080684830150537[0],14.0128:0.00000080684830150537):0.00001600869430789012[0],13/28:0.00000080684830150537):0.00000080684830150537[0]):0.00000080684830150537[0]):0.00000080684830150537[0]):0.00000080686213748555[0]):0.00000081419098609235[0]):0.00001321293957604384[0]):0.00000080684830150537[0],14.0017:0.00000080684830150537):0.00000131423561262305[0],14.0035:0.00000080684830150537):0.00000080684830150537[0]):0.00000080684830150537[0]):0.00000080684830150537[0],14.0145:0.00000080684830150537):0.00000080684830150537[0]):0.00000080764211853033[0]):0.00000163654097832274[0]):0.00000085322077389144[0],14.0018:0.00000080684830150537):0.00000082250365532462[0]):0.00000080684830150537[0],14.0014:0.00000080684830150537):0.00000080684830150537[0]):0.00000080684830150537[0],14.0146:0.00000080684830150537):0.00000149442305788887[0],14.0163:0.00000080684830150537):0.00000080684830150537[0]):0.00000080684830150537[0]):0.00000080684830150537[0]):0.00000080684830150537[0]):0.00000080684830150537[0]):0.00000080684830150537[0]):0.00000989111843168005[0]):0.00000492504764791129[1],13/39:0.00000080684830150537):0.00000080684830150537[1],13/35:0.00000080684830150537):0.00000080684830150537[0]):0.00000080684830150537[1]):0.00001844659118041612[2]):0.00000080701719520155[3],14.0044:0.00000080684830150537):0.00000126210022563384[4]):0.00040674917354125578[15],((13/120:0.00000080684830150537,(14.0076:0.00000080684830150537,(14.0015:0.00000080684830150537,14.0008:0.00000080684830150537):0.00000080684830150537[6]):0.00000080684830150537[0]):0.00001592664942430531[2],(((13/18:0.00000080684830150537,((13/26:0.00000080684830150537,(13/15:0.00000080684830150537,((13/520:0.00000080684830150537,(14.0061:0.00000080684830150537,(((14.0069:0.00000080684830150537,(14.0011:0.00000080684830150537,(14.0026:0.00000080684830150537,(14.0002:0.00000080684830150537,(14.0099:0.00000080684830150537,(14.0103:0.00000080684830150537,(14.0001:0.00000080684830150537,((14.0169:0.00000080684830150537,(14.0092:0.00000080684830150537,((((14.0098:0.00000080684830150537,(14.0190:0.00000080684830150537,(14.0072:0.00000080684830150537,(14.0173:0.00000080684830150537,(RB1:0.00000080684830150537,RB2:0.00000080684830150537):0.00000080684830150537[33]):0.00000080684830150537[9]):0.00000702393638212422[5]):0.00000080684830150537[1]):0.00000080684830150537[1],((DK14/16:0.00001074185126145502,SE427/17:0.00000080684830150537):0.00002454801438817672[97],(14.0188:0.00000080684830150537,(11/08Warrior:0.00000080684830150537,FW1:0.00000080684830150537):0.00000080684830150537[89]):0.00000080684830150537[15]):0.00004078309119453002[73]):0.00000080684830150537[1],14.0059:0.00000080684830150537):0.00002171609650873739[0],14.0101:0.00000080684830150537):0.00000080684830150537[0]):0.00000080684830150537[0]):0.00000080684830150537[0],14.0093:0.00000080684830150537):0.00000080684830150537[0]):0.00000080684830150537[0]):0.00000080684830150537[0]):0.00000080684830150537[0]):0.00000080684830150537[0]):0.00000080684830150537[0]):0.00000080684830150537[0]):0.00000080684830150537[1],13/19:0.00000080684830150537):0.00000080684830150537[1],13/123:0.00000080684830150537):0.00000080684830150537[1]):0.00000080684830150537[2]):0.00000080684830150537[2],13/65:0.00000080684830150537):0.00000080684830150537[1]):0.00000080684830150537[1]):0.00000080684830150537[0],14.0060:0.00000080684830150537):0.00000080684830150537[1]):0.00000080684830150537[2],14.0009:0.00000080684830150537):0.00006480663717908376[6],13/27:0.00000080684830150537):0.00000597670419677647[4]):0.00017997204174592847[73]):0.00015630217947692107[9]):0.00010121199853058086[4],(((((((((16.0783:0.00000080684830150537,16.0787:0.00000080684830150537):0.00014277410855046210[100],(16.0801:0.00000080684830150537,16.0789:0.00000080684830150537):0.00012840375115733709[100]):0.00006386704198833408[43],(16.0800:0.00010836612570590612,((16.0793:0.00000080684830150537,(16.0791:0.00000080684830150537,16.0790:0.00000080684830150537):0.00000080684830150537[100]):0.00007603039559538393[100],(16.0798:0.00000080684830150537,16.0804:0.00000080684830150537):0.00015840929256785344[100]):0.00008430760687175152[55]):0.00005500330772895353[33]):0.00003100386528407988[5],(16.0788:0.00011237174988494290,16.0794:0.00007429365284982318):0.00008928540497229722[44]):0.00008097113399394140[16],((16.0797:0.00000080684830150537,16.0803:0.00000080684830150537):0.00004031994404033919[100],(16.0802:0.00001863594256577793,16.0799:0.00005538431503594924):0.00006717554203968512[14]):0.00002311156238859929[8]):0.00019073511074730183[85],17.0192:0.00012929485765290102):0.00008194613943822044[14],16.0144:0.00010367755145899028):0.00007908478502700727[5],(16.0782:0.00000356031346789349,(17.0207:0.00000080684830150537,(16.0786:0.00000080684830150537,17.0197:0.00000080684830150537):0.00000080684830150537[60]):0.00001098506229544863[73]):0.00011107646898537402[95]):0.00008689562231612982[1],((16.0796:0.00008157663302998688,((17.0193:0.00000080684830150537,17.0194:0.00000080684830150537):0.00010303663640481504[100],17.0190:0.00005813636850330150):0.00008523337632931434[56]):0.00008191643837738332[17],(17.0208:0.00000080684830150537,(17.0203:0.00000080684830150537,17.0189:0.00000080684830150537):0.00000080684830150537[76]):0.00012161186361932389[100]):0.00009186408882726951[11]):0.00007537949913182625[1]):0.00004197608995221381[0],15.0349:0.00001966102739405168):0.00006211248632034293[0]):0.00005779118357331772[3]):0.00015907431685553713[7]):0.00010596648335822796[15]):0.00022889242303676227[59]):0.00000690340966062221[0],15.035:0.00000080684830150537):0.00000080692733241064[0],15.0367:0.00000080684830150537):0.00000082262622446276[0]):0.00000080684830150537[0]):0.00001730367273205727[11],15.0308:0.00000080684830150537);
