# Supplementary material for: MARPLE, a point-of-care, strain-level disease diagnostics and surveillance tool for complex fungal pathogens
Source: BMC Biol. 2019 Aug 13;17:65. doi: 10.1186/s12915-019-0684-y (PMC6691556; doi:10.1186/s12915-019-0684-y)
Supplement: Supplementary file 12 — Phylogenetic analysis of the 301 global Pst isolates using sequences for the 242 genes selected and data for these genes generated on the HiSeq platform for the 51 Ethiopian Pst isolates with bootstrap values. Newick format. (NEWICK 20 kb) [file 12915_2019_684_MOESM12_ESM.newick]

(17-05585:0.00000105822184471254,((17-0557:0.00000105822184471254,(((17-0503:0.00000105822184471254,(16.0774:0.00000105822184471254,(((17-0614:0.00000105822184471254,(17-0532:0.00000105822184471254,(17-0496:0.00000105822184471254,(17-0519:0.00000105822184471254,(17-0593:0.00000105822184471254,(((((((17-0494:0.00000105822184471254,(17-0595:0.00000105822184471254,((17-0493:0.00000105822184471254,(17-0600:0.00000105822184471254,((17-0565:0.00000105822184471254,((17-0613:0.00000105822184471254,((17-0602:0.00000105822184471254,(17-052:0.00000105822184471254,(17-0553:0.00000105822184471254,(17-0521:0.00000105822184471254,17-0563:0.00000105822184471254):0.00000105822184471254[7]):0.00000105822184471254[1]):0.00000105822184471254[4]):0.00000105822184471254[3],17-0569:0.00000105822184471254):0.00000105822184471254[1]):0.00000105822184471254[2],17-0500:0.00000105822184471254):0.00000105822184471254[1]):0.00000105822184471254[1],17-0495:0.00000105822184471254):0.00000105822184471254[0]):0.00000105822184471254[0]):0.00000105822184471254[0],17-0518:0.00000105822184471254):0.00000105822184471254[0]):0.00000105822184471254[0]):0.00000105822184471254[0],17-0489:0.00000105822184471254):0.00000105822184471254[0],17-057:0.00000105822184471254):0.00000105822184471254[0],17-0491:0.00000322010404622260):0.00000105822184471254[0],17-0523:0.00000105822184471254):0.00000105822184471254[0],17-0497:0.00000105822184471254):0.00000105822184471254[0],17-0499:0.00000105822184471254):0.00000105822184471254[0]):0.00000105822184471254[0]):0.00000105822184471254[0]):0.00000808246956855722[0]):0.00002180284710332793[0]):0.00000112425753937643[0],16.0779:0.00000105822184471254):0.00000105822184471254[0],17-0498:0.00000105822184471254):0.00000273002088479333[0]):0.00000105822184471254[0]):0.00000105822184471254[0],17-0504:0.00000105822184471254):0.00000105822184471254[0],(17-049:0.00000105822184471254,(17-0525:0.00000105822184471254,(16.0775:0.00000105822184471254,(((((17-0492:0.00000105822184471254,(17-0511:0.00000105822184471254,(17-0528:0.00000105822184471254,17-0559:0.00000105822184471254):0.00000105822184471254[9]):0.00000105822184471254[9]):0.00000748581737268916[3],17-0515:0.00000105822184471254):0.00000105822184471254[1],((17-0612:0.00000105822184471254,((16-0883:0.00000105822184471254,(17-0501:0.00000105822184471254,17-0510:0.00000105822184471254):0.00000105822184471254[20]):0.00000105822184471254[26],17-0507:0.00000105822184471254):0.00000105822184471254[20]):0.00000587009119643208[17],17-0562:0.00000105822184471254):0.00000105822184471254[5]):0.00000105822184471254[0],17-0611:0.00000105822184471254):0.00001265346938186437[0],17-0615:0.00000105822184471254):0.00000105822184471254[0]):0.00000722965216857739[0]):0.00000419615189731355[0]):0.00000105822184471254[0]):0.00002217584557919781[27]):0.00004212618981644988[53],((((((16.0772:0.00000105822184471254,16.0771:0.00000105822184471254):0.00000719511721571930[63],(((T13/3:0.00000105822184471254,((T13/1:0.00000105822184471254,((15.0191:0.00000105822184471254,(15.0189:0.00000105822184471254,(14.0077:0.00000105822184471254,((15.0188:0.00000105822184471254,(Clarecollected(CL1):0.00000105822184471254,14.0120:0.00000105822184471254):0.00000105822184471254[40]):0.00000105822184471254[15],14.0010:0.00000105822184471254):0.00000105822184471254[18]):0.00000105822184471254[27]):0.00000105822184471254[23]):0.00000105822184471254[23],T13/2:0.00000105822184471254):0.00000162228649948178[15]):0.00000105822184471254[17],15.019:0.00000105822184471254):0.00000105822184471254[29]):0.00000105822184471254[20],14.0062:0.00000105822184471254):0.00000110175550740096[26],14.0115:0.00000105822184471254):0.00000617599967059873[2]):0.00002059749970052491[15],(17-0548:0.00000105822184471254,((17-0571:0.00000105822184471254,(17-0567:0.00000105822184471254,17-0564:0.00000105822184471254):0.00000105822184471254[44]):0.00000105822184471254[88],17-0549:0.00000105822184471254):0.00000105822184471254[84]):0.00001914466974248334[96]):0.00013980286223357578[27],((14.0236:0.00003954704547362049,(((12/12:0.00014247678946117495,11/03:0.00011716236324237131):0.00038202798279540653[100],(14.0238:0.00012670423776136612,(14.0240:0.00031214336837558342,14.0239:0.00020481316401460651):0.00017879008870973478[96]):0.00014597579186598862[68]):0.00028118314556116540[84],((14.0080:0.00016044360206509623,((11/13:0.00058056492714995121,(11/128:0.00010810494503061998,(06/01:0.00015057808243177777,12/08:0.00022545098397775169):0.00015375252286586055[96]):0.00150276387573984268[100]):0.00040595399728106726[100],((14.0030:0.00076828999535199821,14.0029:0.00098322788666866984):0.00092238666945326450[100],((Qld-1:0.00024524926257266685,(Qld-3:0.00138140784189063975,Qld-2:0.00011943710131128772):0.00013774981457587742[95]):0.00077785213381618393[100],(ATR-1:0.00090403230528850588,(ATR-3:0.00067691494100506112,ATR-2:0.00099210427269977243):0.00043628189866103470[100]):0.00021108827599654177[98]):0.00113466929665582863[100]):0.00062773247145619698[100]):0.00283741782023754678[100]):0.00088527390772490241[100],((Chile_31:0.00024770714235583893,((Chile_4:0.00018494682506858159,Chile_30:0.00029393577417903452):0.00009578192379528573[34],Chile_18:0.00019589504689634715):0.00007954366990385841[21]):0.00019435440052531849[60],Chile_3:0.00010441598267317670):0.00028500235778592330[64]):0.00055557160205343882[100]):0.00045307592828000191[100]):0.00043662156356885629[100],(((14.0078:0.00000105822184471254,(((13/21:0.00000105822184471254,(13/182:0.00000105822184471254,((13/09:0.00000105822184471254,(13/23:0.00000105822184471254,13/33:0.00000105822184471254):0.00000105822184471254[10]):0.00000105822184471254[3],13/42:0.00000326514306486892):0.00000105822184471254[1]):0.00000105822184471254[1]):0.00000105822184471254[56],78/66:0.00000105822184471254):0.00000642258735819358[43],((((87/27s2:0.00000105822184471254,((08/21Solstice:0.00000105822184471254,((87/66s1:0.00000105822184471254,(WYR88.5SS1:0.00000105822184471254,(WYR88.44SS3:0.00000105822184471254,(WYR88.45SS:0.00000105822184471254,(((j02-022:0.00000105822184471254,(J8861m2:0.00000105822184471254,J0085F:0.00000774185069277388):0.00000105822184471254[36]):0.00000105822184471254[17],J01144Bm1:0.00000105822184471254):0.00000105822184471254[10],WYR88.55SS:0.00000105822184471254):0.00000105822184471254[9]):0.00000105822184471254[1]):0.00000105822184471254[3]):0.00000105822184471254[1]):0.00000105822184471254[0],98/83s3:0.00000105822184471254):0.00000105822184471254[0]):0.00000105822184471254[0],WYR78.66SS1:0.00000105822184471254):0.00000105822184471254[0]):0.00000232479606905317[2],J89121M6:0.00000105822184471254):0.00002760382632082567[4],(((11/140Sterling:0.00000105822184471254,(J89110:0.00000105822184471254,03/7Brock:0.00000105822184471254):0.00000105822184471254[20]):0.00001473525405869895[10],01/34s10:0.00000105822184471254):0.00000105822184471254[4],08/501Timber:0.00000105822184471254):0.00000105822184471254[2]):0.00005316991270283971[48],J02055C:0.00000378480968059740):0.00062201657705726555[100]):0.00007049192858723923[90]):0.00031034260822983549[96],14.0141:0.00001114007514320485):0.00030316950686802075[86],13/38:0.00000105822184471254):0.00011933889236615538[67]):0.00007539579149942296[44]):0.00016705147120910283[17],(((((16.0797:0.00000105822184471254,16.0803:0.00000105822184471254):0.00004298657985221115[100],(((16.0802:0.00002833872995162853,16.0788:0.00012405271198007869):0.00002410050327143911[13],16.0794:0.00009036339235891211):0.00006567052936321206[11],((16.0800:0.00010230720376869328,(((16.0790:0.00000105822184471254,16.0791:0.00000105822184471254):0.00000105822184471254[100],16.0793:0.00000105822184471254):0.00007513365159096117[100],(16.0804:0.00000105822184471254,16.0798:0.00000105822184471254):0.00015444669609768622[100]):0.00008713174810886346[59]):0.00005717600630879833[27],((16.0787:0.00000105822184471254,16.0783:0.00000105822184471254):0.00013640616167891556[100],(16.0789:0.00000105822184471254,16.0801:0.00000105822184471254):0.00012510972651947345[100]):0.00006838410524899303[48]):0.00003074653768504539[5]):0.00005533421397207942[2]):0.00008868826534497324[16],16.0799:0.00006407274411797838):0.00012674543755946026[82],(((17.0192:0.00010507843197005936,(17.0190:0.00006303778262180321,(17.0194:0.00000105822184471254,17.0193:0.00000105822184471254):0.00011645863219126143[100]):0.00006222519359321672[60]):0.00002678626445392348[7],16.0796:0.00010586256910692094):0.00009278430836985279[17],((((17.0207:0.00000105822184471254,(17.0197:0.00000105822184471254,16.0786:0.00000105822184471254):0.00000105822184471254[57]):0.00000835620350260675[72],16.0782:0.00000346424758158280):0.00012055815148587119[96],((16.0144:0.00009683757397981430,(17.0191:0.00000105822184471254,17.0204:0.00000105822184471254):0.00007356276902022295[100]):0.00013073861434663287[56],(17.0208:0.00000105822184471254,(17.0203:0.00000105822184471254,17.0189:0.00000105822184471254):0.00000105822184471254[82]):0.00011325665068678268[100]):0.00006872327680604916[23]):0.00005737214984391976[8],(15.0349:0.00003468273077322147,((15.0078:0.00005364474486778021,(17.0030:0.00000105822184471254,(17.0089:0.00000105822184471254,(17.0286:0.00000105822184471254,(((15.0409:0.00000105822184471254,(17.0029:0.00000105822184471254,((16.0183:0.00000105822184471254,((16.0182:0.00000105822184471254,(14.0027:0.00000105822184471254,16.0186:0.00000105822184471254):0.00000105822184471254[87]):0.00000105822184471254[77],14.0025:0.00000105822184471254):0.00000105822184471254[42]):0.00000105822184471254[57],17.0090:0.00000105822184471254):0.00000105822184471254[24]):0.00000105822184471254[8]):0.00000542071898975615[8],17.0028:0.00000105822184471254):0.00000875863912694692[26],17.0031:0.00000105822184471254):0.00000105822184471254[13]):0.00000105822184471254[19]):0.00000105822184471254[38]):0.00010842681994735965[100]):0.00008160613785309160[61],((13/40:0.00000105822184471254,(((((((14.0180:0.00000105822184471254,(14.0094:0.00000105822184471254,(14.0005:0.00000105822184471254,(14.0014:0.00000105822184471254,(14.0037:0.00000105822184471254,(14.0127:0.00000105822184471254,((14.0041:0.00000105822184471254,(14.0021:0.00000105822184471254,(((((14.0096:0.00000105822184471254,(((((14.0152:0.00000105822184471254,(((14.0020:0.00000105822184471254,(13/20:0.00000105822184471254,((((13/29:0.00000105822184471254,((13/34:0.00000105822184471254,(13/36:0.00000105822184471254,(14.0019:0.00000105822184471254,((13/24:0.00000105822184471254,(((((13/35:0.00000105822184471254,(13/39:0.00000105822184471254,(13/30:0.00000105822184471254,(13/32:0.00000105822184471254,(14.0126:0.00000105822184471254,(((((((14.0023:0.00000105822184471254,(14.0084:0.00000105822184471254,(14.0203:0.00000105822184471254,(14.0139:0.00000105822184471254,(((14.0129:0.00000105822184471254,(14.0158:0.00000105822184471254,(14.0227:0.00000105822184471254,14.0195:0.00000105822184471254):0.00001702713970901742[40]):0.00000105822184471254[0]):0.00000105822184471254[0],14.0036:0.00000105822184471254):0.00000105822184471254[0],14.0176:0.00000105822184471254):0.00000105822184471254[0]):0.00000105822184471254[0]):0.00000105822184471254[0]):0.00000105822184471254[0]):0.00000105822184471254[0],14.0040:0.00000105822184471254):0.00000105822184471254[0],14.0035:0.00000105822184471254):0.00000105822184471254[0],14.0181:0.00000105822184471254):0.00000105822184471254[0],14.0165:0.00000105822184471254):0.00000105822184471254[0],14.0142:0.00000105822184471254):0.00000105822184471254[0],14.0081:0.00000105822184471254):0.00000105822184471254[0]):0.00000105822184471254[0]):0.00000105822184471254[0]):0.00000105822184471254[0]):0.00000105822184471254[0]):0.00000105822184471254[0],13/28:0.00000105822184471254):0.00000105822184471254[0],14.0004:0.00000105822184471254):0.00000105822184471254[0],13/37:0.00000105822184471254):0.00000105822184471254[0],13/14:0.00000105822184471254):0.00000105822184471254[0]):0.00000105822184471254[0],13/22:0.00000105822184471254):0.00000105822184471254[0]):0.00000105822184471254[0]):0.00000105822184471254[0]):0.00000105822184471254[0],14.0097:0.00000105822184471254):0.00000105822184471254[0]):0.00000105822184471254[0],13/71:0.00000105822184471254):0.00000105822184471254[0],13/12:0.00000105822184471254):0.00000105822184471254[0],13/25:0.00000105822184471254):0.00000105822184471254[0]):0.00000105822184471254[0]):0.00000105822184471254[0],(((14.0079:0.00000105822184471254,(((14.0087:0.00000105822184471254,((14.0160:0.00000105822184471254,(((14.0182:0.00000105822184471254,(14.0205:0.00000105822184471254,((((14.0193:0.00000105822184471254,(14.0225:0.00000105822184471254,(14.0210:0.00000105822184471254,(14.0226:0.00000105822184471254,14.0216:0.00000105822184471254):0.00000105822184471254[26]):0.00000105822184471254[9]):0.00000105822184471254[3]):0.00000105822184471254[2],14.0218:0.00000105822184471254):0.00000105822184471254[3],14.0183:0.00000105822184471254):0.00000105822184471254[10],14.0191:0.00000105822184471254):0.00000105822184471254[15]):0.00000105822184471254[11]):0.00008900141191706358[34],14.0091:0.00000105822184471254):0.00000105822184471254[6],14.0086:0.00000105822184471254):0.00000105822184471254[1]):0.00000105822184471254[0],14.0105:0.00000105822184471254):0.00000105822184471254[0]):0.00000105822184471254[0],14.0006:0.00000105822184471254):0.00000105822184471254[0],14.0159:0.00000105822184471254):0.00000105822184471254[0]):0.00000105822184471254[0],14.0174:0.00000105822184471254):0.00000105822184471254[0],14.0024:0.00000105822184471254):0.00000105822184471254[0]):0.00000105822184471254[0],14.0108:0.00000105822184471254):0.00000105822184471254[0]):0.00000105822184471254[0],14.0146:0.00000105822184471254):0.00000105822184471254[0],14.0095:0.00000105822184471254):0.00000105822184471254[0],14.0089:0.00000105822184471254):0.00000105822184471254[0],14.0128:0.00000105822184471254):0.00000105822184471254[0]):0.00000105822184471254[0],14.0088:0.00000105822184471254):0.00000105822184471254[0],14.0046:0.00000105822184471254):0.00000105822184471254[0],14.0017:0.00000105822184471254):0.00000105822184471254[0],14.0007:0.00000105822184471254):0.00000105822184471254[0]):0.00000105822184471254[0]):0.00000105822184471254[0],14.0043:0.00000105822184471254):0.00000105822184471254[0]):0.00000105822184471254[0]):0.00000105822184471254[0]):0.00000105822184471254[0]):0.00000105822184471254[0]):0.00000105822184471254[0]):0.00000105822184471254[0],14.0145:0.00000105822184471254):0.00000105822184471254[0],14.0155:0.00000105822184471254):0.00000105822184471254[0],(14.0175:0.00000105822184471254,(14.0047:0.00000105822184471254,(((14.0090:0.00000105822184471254,((14.0163:0.00000105822184471254,((((((14.0148:0.00000105822184471254,(14.0179:0.00000105822184471254,((14.0215:0.00000666460910477781,14.0140:0.00000105822184471254):0.00000105822184471254[1],14.0016:0.00000105822184471254):0.00000105822184471254[2]):0.00000105822184471254[0]):0.00000105822184471254[0],14.0135:0.00000105822184471254):0.00000105822184471254[0],14.0166:0.00000105822184471254):0.00000105822184471254[0],14.0153:0.00000105822184471254):0.00000105822184471254[0],14.0172:0.00000105822184471254):0.00000105822184471254[0],14.0018:0.00000105822184471254):0.00000105822184471254[0]):0.00000105822184471254[0],14.0167:0.00000105822184471254):0.00000105822184471254[0]):0.00000105822184471254[0],14.0042:0.00000105822184471254):0.00000105822184471254[0],14.0085:0.00000105822184471254):0.00000105822184471254[0]):0.00000105822184471254[0]):0.00000105822184471254[0]):0.00000105822184471254[0],14.0151:0.00000105822184471254):0.00000105822184471254[0],14.0039:0.00000105822184471254):0.00001917778458872354[3],14.0044:0.00000105822184471254):0.00000827796332677616[8]):0.00041767484935199915[53],((((14.0009:0.00000105822184471254,((((13/15:0.00000105822184471254,((13/19:0.00000105822184471254,(((14.0026:0.00000105822184471254,((13/520:0.00000105822184471254,((14.0103:0.00000105822184471254,((14.0093:0.00000105822184471254,(((14.0092:0.00000105822184471254,((((14.0188:0.00000105822184471254,(FW1:0.00000105822184471254,11/08Warrior:0.00000105822184471254):0.00000105822184471254[99]):0.00001409350257874151[75],(14.0098:0.00000105822184471254,((14.0072:0.00000105822184471254,((14.0173:0.00000105822184471254,(RB2:0.00000105822184471254,RB1:0.00000105822184471254):0.00000105822184471254[39]):0.00000105822184471254[3],13/123:0.00000105822184471254):0.00000105822184471254[2]):0.00000441819478064802[0],14.0190:0.00000105822184471254):0.00000105822184471254[0]):0.00000105822184471254[0]):0.00000105822184471254[1],14.0059:0.00000105822184471254):0.00002686359864663922[2],14.0061:0.00000105822184471254):0.00000105822184471254[1]):0.00000105822184471254[1],14.0101:0.00000105822184471254):0.00000105822184471254[1],14.0169:0.00000105822184471254):0.00000105822184471254[1]):0.00000105822184471254[1],14.0001:0.00000105822184471254):0.00000105822184471254[1]):0.00000105822184471254[0],14.0011:0.00000105822184471254):0.00000105822184471254[0]):0.00000105822184471254[0],14.0002:0.00000105822184471254):0.00000105822184471254[2]):0.00000105822184471254[2],14.0069:0.00000105822184471254):0.00000105822184471254[2],14.0099:0.00000105822184471254):0.00000105822184471254[5]):0.00000105822184471254[5],13/65:0.00000105822184471254):0.00000105822184471254[5]):0.00000105822184471254[5],13/26:0.00000105822184471254):0.00000105822184471254[4],14.0060:0.00000105822184471254):0.00000105822184471254[4],13/18:0.00000105822184471254):0.00000105822184471254[1]):0.00006564852299606451[6],13/27:0.00000105822184471254):0.00000105822184471254[4],14.0076:0.00000105822184471254):0.00001545169596262639[5],(13/120:0.00000105822184471254,(14.0008:0.00000105822184471254,14.0015:0.00000249132897332753):0.00000105822184471254[1]):0.00000105822184471254[3]):0.00014315488693470238[76]):0.00017992121386479703[22]):0.00012220905589378919[20]):0.00004071523544840145[1]):0.00008790518186281039[3]):0.00011335153497628089[12]):0.00011606664355593518[17],((15.0574:0.00000105822184471254,15.0579:0.00000105822184471254):0.00000105822184471254[47],15.0573:0.00000105822184471254):0.00035456810546561534[100]):0.00008792617882739443[21]):0.00008999363805250545[48],(15.0355:0.00000861824779728889,(((15.0359:0.00000105822184471254,15.0351:0.00000105822184471254):0.00000105822184471254[25],15.0306:0.00000105822184471254):0.00001211080242214870[6],(16.0527:0.00000105822184471254,((16.0555:0.00000473288078573699,((17.0008:0.00000105822184471254,(17.0006:0.00000105822184471254,((15.0604:0.00000105822184471254,(15.035:0.00000105822184471254,((15.0348:0.00000105822184471254,(15.0597:0.00000105822184471254,(15.0367:0.00000105822184471254,((17.0057:0.00000105822184471254,(17.0058:0.00000105822184471254,(((16.0142:0.00000105822184471254,(15.0608:0.00000105822184471254,(15.0305:0.00000105822184471254,15.0363:0.00000105822184471254):0.00000105822184471254[0]):0.00000105822184471254[0]):0.00000105822184471254[0],((16.0548:0.00000105822184471254,(((15.0609:0.00000105822184471254,(15.0596:0.00000105822184471254,(15.036:0.00000105822184471254,(15.0353:0.00000105822184471254,((15.0361:0.00000105822184471254,(15.0354:0.00000105822184471254,(16.0529:0.00000105822184471254,(15.0357:0.00000105822184471254,(15.0308:0.00000105822184471254,((16.0536:0.00000105822184471254,(16.0145:0.00000105822184471254,15.0366:0.00000105822184471254):0.00000169246882000229[29]):0.00000105822184471254[22],16.0554:0.00000105822184471254):0.00000105822184471254[6]):0.00000105822184471254[4]):0.00000105822184471254[1]):0.00000105822184471254[4]):0.00000105822184471254[2]):0.00000105822184471254[0],16.0535:0.00000105822184471254):0.00000105822184471254[2]):0.00000105822184471254[2]):0.00000105822184471254[0]):0.00000105822184471254[0]):0.00000105822184471254[0],17.0023:0.00000105822184471254):0.00000105822184471254[0],15.0606:0.00000105822184471254):0.00000105822184471254[0]):0.00000105822184471254[0],15.0365:0.00000105822184471254):0.00000105822184471254[0]):0.00000105822184471254[1],17.0007:0.00000105822184471254):0.00000105822184471254[0]):0.00000105822184471254[0]):0.00000105822184471254[0],17.0022:0.00000105822184471254):0.00000105822184471254[0]):0.00000105822184471254[0]):0.00000105822184471254[0]):0.00000105822184471254[0],15.0356:0.00000105822184471254):0.00000105822184471254[0]):0.00000105822184471254[0]):0.00000105822184471254[0],16.0551:0.00000105822184471254):0.00000105822184471254[0]):0.00000105822184471254[1]):0.00000105822184471254[1],17.0021:0.00000105822184471254):0.00001700209066345877[3]):0.00000105822184471254[0],17.0009:0.00000105822184471254):0.00001702640979131606[8]):0.00000105822184471254[5]):0.00002085544054955356[28]):0.00019183778795030064[83]):0.00033245086491372997[81]):0.00001732265739696995[94],16.0776:0.00000105822184471254);
